# Supplementary material for: High Normal Range of Free Thyroxine is Associated with Decreased Triglycerides and with Increased High-Density Lipoprotein Cholesterol Based on Population Representative Data
Source: PubMed Central journal article supplement (PMC6616420; doi:10.3390/jcm8060758), 2019-05-28
Supplement: jcm-08-00758-s001.pdf [file jcm-08-00758-s001.pdf]

**Supplementary Table 1.** Changes in lipid profiles according to TSH quartiles.

| Lipid profiles                     | Q1<br>(TSH <1.55 IU/L) | Q2<br>(1.55-2.26 IU/L) | Q3<br>(2.27-3.24 IU/L) | Q4<br>(TSH >3.25 IU/L) | <i>p</i> for trend |
|------------------------------------|------------------------|------------------------|------------------------|------------------------|--------------------|
| <b>Total cholesterol (mg/dl)</b>   |                        |                        |                        |                        |                    |
| Crude                              | Reference (1.0)        | 0.56 ± 1.84            | 1.11 ± 1.67            | 3.89 ± 1.93            | 0.044              |
| Model 1                            | Reference (1.0)        | 0.52 ± 1.81            | 0.65 ± 1.64            | 3.24 ± 1.87            | 0.095              |
| Model 2                            | Reference (1.0)        | 0.29 ± 1.77            | 0.49 ± 1.62            | 3.21 ± 1.87            | 0.094              |
| Model 3                            | Reference (1.0)        | 0.50 ± 1.78            | 0.80 ± 1.63            | 3.63 ± 1.89            | 0.059              |
| Model 4                            | Reference (1.0)        | 0.77 ± 1.78            | 0.67 ± 1.64            | 3.29 ± 1.93            | 0.227              |
| <b>Triglyceride (mg/dl)</b>        |                        |                        |                        |                        |                    |
| Crude                              | Reference (1.0)        | 8.35 ± 6.77            | 11.30 ± 7.08           | 4.67 ± 6.16            | 0.398              |
| Model 1                            | Reference (1.0)        | 9.81 ± 6.58            | 13.20 ± 6.97           | 11.28 ± 6.00           | 0.119              |
| Model 2                            | Reference (1.0)        | 8.67 ± 6.38            | 12.05 ± 6.74           | 11.16 ± 5.78           | 0.047              |
| Model 3                            | Reference (1.0)        | 11.22 ± 6.26           | 15.66 ± 6.45           | 15.57 ± 5.69           | 0.004              |
| Model 4                            | Reference (1.0)        | 10.57 ± 6.23           | 15.99 ± 6.50           | 16.20 ± 5.91           | 0.004              |
| <b>HDL-cholesterol (mg/dl)</b>     |                        |                        |                        |                        |                    |
| Crude                              | Reference (1.0)        | 0.66 ± 0.66            | 0.04 ± 0.64            | 0.35 ± 0.71            | 0.873              |
| Model 1                            | Reference (1.0)        | 0.50 ± 0.62            | 0.24 ± 0.60            | 0.39 ± 0.68            | 0.363              |
| Model 2                            | Reference (1.0)        | 0.63 ± 0.59            | 0.17 ± 0.58            | 0.39 ± 0.66            | 0.325              |
| Model 3                            | Reference (1.0)        | 0.62 ± 0.60            | 0.19 ± 0.58            | 0.46 ± 0.66            | 0.273              |
| Model 4                            | Reference (1.0)        | 0.68 ± 0.59            | 0.24 ± 0.59            | 0.50 ± 0.67            | 0.241              |
| <b>LDL-cholesterol (mg/dl)</b>     |                        |                        |                        |                        |                    |
| Crude                              | Reference (1.0)        | 1.77 ± 1.71            | 1.11 ± 1.81            | 2.61 ± 1.81            | 0.142              |
| Model 1                            | Reference (1.0)        | 1.94 ± 1.68            | 1.75 ± 1.76            | 1.37 ± 1.76            | 0.448              |
| Model 2                            | Reference (1.0)        | 2.07 ± 1.66            | 1.75 ± 1.76            | 1.37 ± 1.77            | 0.436              |
| Model 3                            | Reference (1.0)        | 2.37 ± 1.65            | 2.14 ± 1.75            | 0.97 ± 1.76            | 0.575              |
| Model 4                            | Reference (1.0)        | 2.02 ± 1.67            | 2.30 ± 1.76            | 0.55 ± 1.76            | 0.823              |
| <b>Non-HDL-cholesterol (mg/dl)</b> |                        |                        |                        |                        |                    |
| Crude                              | Reference (1.0)        | 0.10 ± 1.88            | 1.15 ± 1.70            | 3.54 ± 1.97            | 0.058              |
| Model 1                            | Reference (1.0)        | 0.02 ± 1.82            | 0.89 ± 1.64            | 3.62 ± 1.90            | 0.052              |
| Model 2                            | Reference (1.0)        | 0.34 ± 1.74            | 0.66 ± 1.60            | 3.60 ± 1.88            | 0.046              |
| Model 3                            | Reference (1.0)        | 0.12 ± 1.74            | 0.99 ± 1.61            | 4.09 ± 1.90            | 0.025              |
| Model 4                            | Reference (1.0)        | 0.09 ± 1.75            | 0.90 ± 1.61            | 3.79 ± 1.95            | 0.047              |

The association between TSH quartiles and lipid profiles were performed by linear regression. HDL, high density lipoprotein; LDL, low density lipoprotein. Model 1: adjusted by age and sex; Model 2: Model 1 + body mass index; Model 3: Model 2 + smoking, alcohol consumption, and physical activity; Model 4: Model 3 + Urine iodine, peroxidase antibody, and diabetes mellitus.

**Supplementary Table 2.** Risk of dyslipidemia according to TSH quartiles.

| <b>Presence of dyslipidemia<br/>or its component</b> | <b>Q1<br/>(TSH &lt;1.55 IU/L)</b> | <b>Q2<br/>(1.55-2.26 IU/L)</b> | <b>Q3<br/>(2.27-3.24 IU/L)</b> | <b>Q4<br/>(TSH &gt;3.25 IU/L)</b> | <b>p for<br/>trend</b> |
|------------------------------------------------------|-----------------------------------|--------------------------------|--------------------------------|-----------------------------------|------------------------|
| <b>Dyslipidemia</b>                                  |                                   |                                |                                |                                   |                        |
| Crude                                                | Reference (1.0)                   | 1.00 (0.80-1.24)               | 1.21 (0.97-1.52)               | 1.14 (0.91-1.41)                  | 0.104                  |
| Model 1                                              | Reference (1.0)                   | 1.00 (0.80-1.25)               | 1.20 (0.95-1.51)               | 1.13 (0.90-1.40)                  | 0.133                  |
| Model 2                                              | Reference (1.0)                   | 0.98 (0.78-1.24)               | 1.20 (0.95-1.52)               | 1.14 (0.91-1.43)                  | 0.106                  |
| Model 3                                              | Reference (1.0)                   | 1.01 (0.80-1.27)               | 1.26 (0.99-1.59)               | 1.20 (0.95-1.52)                  | 0.039                  |
| Model 4                                              | Reference (1.0)                   | 1.00 (0.79-1.26)               | 1.27 (1.00-1.61)               | 1.22 (0.96-1.54)                  | 0.031                  |
| <b>Hypertriglyceridemia</b>                          |                                   |                                |                                |                                   |                        |
| Crude                                                | Reference (1.0)                   | 1.04 (0.81-1.33)               | 1.21 (0.94-1.55)               | 1.03 (0.81-1.32)                  | 0.532                  |
| Model 1                                              | Reference (1.0)                   | 1.07 (0.83-1.39)               | 1.27 (0.98-1.65)               | 1.17 (0.90-1.52)                  | 0.113                  |
| Model 2                                              | Reference (1.0)                   | 1.06 (0.81-1.38)               | 1.27 (0.97-1.67)               | 1.18 (0.90-1.54)                  | 0.105                  |
| Model 3                                              | Reference (1.0)                   | 1.12 (0.84-1.48)               | 1.38 (1.04-1.82)               | 1.30 (0.98-1.71)                  | 0.022                  |
| Model 4                                              | Reference (1.0)                   | 1.12 (0.85-1.47)               | 1.40 (1.06-1.86)               | 1.35 (1.02-1.80)                  | 0.011                  |
| <b>High LDL-cholesterol</b>                          |                                   |                                |                                |                                   |                        |
| Crude                                                | Reference (1.0)                   | 1.02 (0.83-1.27)               | 1.00 (0.80-1.25)               | 1.17 (0.93-1.46)                  | 0.224                  |
| Model 1                                              | Reference (1.0)                   | 1.02 (0.82-1.28)               | 0.97 (0.77-1.22)               | 1.12 (0.89-1.41)                  | 0.469                  |
| Model 2                                              | Reference (1.0)                   | 1.01 (0.81-1.27)               | 0.97 (0.77-1.23)               | 1.12 (0.88-1.41)                  | 0.465                  |
| Model 3                                              | Reference (1.0)                   | 1.00 (0.79-1.25)               | 0.95 (0.75-1.20)               | 1.09 (0.86-1.38)                  | 0.603                  |
| Model 4                                              | Reference (1.0)                   | 1.02 (0.81-1.28)               | 0.94 (0.74-1.20)               | 1.07 (0.85-1.36)                  | 0.745                  |
| <b>Non-HDL-cholesterol</b>                           |                                   |                                |                                |                                   |                        |
| Crude                                                | Reference (1.0)                   | 0.97 (0.76-1.24)               | 1.08 (0.85-1.37)               | 1.11 (0.87-1.43)                  | 0.303                  |
| Model 1                                              | Reference (1.0)                   | 0.98 (0.76-1.26)               | 1.07 (0.83-1.37)               | 1.12 (0.86-1.45)                  | 0.320                  |
| Model 2                                              | Reference (1.0)                   | 0.96 (0.74-1.23)               | 1.05 (0.82-1.36)               | 1.12 (0.85-1.47)                  | 0.333                  |
| Model 3                                              | Reference (1.0)                   | 0.97 (0.75-1.26)               | 1.08 (0.84-1.40)               | 1.16 (0.87-1.53)                  | 0.234                  |
| Model 4                                              | Reference (1.0)                   | 0.99 (0.76-1.28)               | 1.07 (0.83-1.38)               | 1.12 (0.84-1.49)                  | 0.382                  |

The association between TSH quartiles and dyslipidemia and component of dyslipidemia were performed by logistic regression analysis considering confounders. HDL, high density lipoprotein; LDL, low density lipoprotein. Model 1: adjusted by age and sex; Model 2: Model 1 + body mass index; Model 3: Model 2 + smoking, alcohol consumption, and physical activity; Model 4: Model 3 + Urine iodine, peroxidase antibody, and diabetes mellitus.
